# Supplementary material
Source: publisher figshare collection journal article supplement (https://acs.figshare.com/ndownloader/files/5759307)

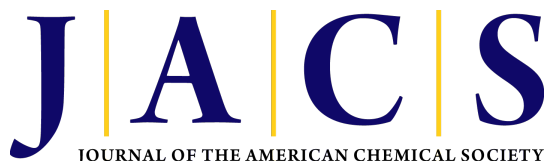

J | A | C | S  
JOURNAL OF THE AMERICAN CHEMICAL SOCIETY

J. Am. Chem. Soc., 1998, 120(30), 7655-7656, DOI:[10.1021/ja980566b](https://doi.org/10.1021/ja980566b)

#### Terms & Conditions

Electronic Supporting Information files are available without a subscription to ACS Web Editions. The American Chemical Society holds a copyright ownership interest in any copyrightable Supporting Information. Files available from the ACS website may be downloaded for personal use only. Users are not otherwise permitted to reproduce, republish, redistribute, or sell any Supporting Information from the ACS website, either in whole or in part, in either machine-readable form or any other form without permission from the American Chemical Society. For permission to reproduce, republish and redistribute this material, requesters must process their own requests via the RightsLink permission system. Information about how to use the RightsLink permission system can be found at <http://pubs.acs.org/page/copyright/permissions.html>

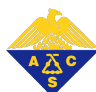

ACS Publications

MOST TRUSTED. MOST CITED. MOST READ.

Copyright © 1998 American Chemical Society

## Supplementary Material

### CD Analyses.

CD spectra were obtained at 0.052, 0.099, 0.205, 0.456, 0.608, 0.958, 1.900, 2.888 mM on a Jasco J-600 spectropolarimeter at room temperature either as a function of concentration or pH.  $[\theta]_{217}$  was used as an indication of  $\beta$  structure. A 2.88 mM stock solution of **1** was diluted with 0.2 M phosphate/0.1 M citrate buffer at pH 5.8. The concentration dependency was fit to the following equation,

$$T = \frac{K_d \left( 1 - \frac{(\theta_{ex} - \theta_A)}{(\theta_M - \theta_A)} \right)}{\sqrt[n-1]{n \left( \frac{(\theta_{ex} - \theta_A)}{(\theta_M - \theta_A)} \right)^n}}$$

where  $[\theta]_{ex}$ ,  $[\theta]_A$ , and  $[\theta]_M$  are mean residue ellipticities of the experimental sample, the monomer and the aggregate respectively at 217 nm,  $T$  is the total peptide concentration,  $K_d$  is the dissociation constant, and  $n$  is the number of peptide molecules per aggregate. A stock solution of **1** was diluted into different phosphate/citrate ratios to achieve a final peptide concentration of 0.76 mM at the indicated pH. The pH dependency of  $[\theta]_{217}$  was fit to the following expression,

$$[\theta]_{217} = \frac{\alpha T}{\left( 1 + \frac{H}{K_1} + \frac{K_2}{H} \right)}$$

where  $K_1$  and  $K_2$  are the constants for the two relevant dissociations and  $T$  is the total peptide concentration.

### Captions.

**Figure 1S.** Characterization of **1**. **A.** **1** was analyzed by reverse phase HPLC using a Rainin C18 analytical column and a 0 to 80% water-acetonitrile gradient (both containing 0.1% TFA, v/v) over 40 minutes. **B.** MALDI-TOF mass spectral analysis of **1**. **C.** Synthetic peptide was cleaved from PEG at the C-terminus using CNBr<sup>1</sup> in trifluoroethanol/formic acid/water (50/35/15, v/v/v). Products were solubilized in 8 M guanidine HCl and then evaluated by reverse phase HPLC as described above. **D.** The purified peptide from HPLC were analyzed by MALDI-TOF mass spectral analysis.

**Figure 2S.** Congo Red binding experiments. When performed by the methods described by Klunk et al.,<sup>2</sup> Congo Red showed the characteristic red shift of the absorbance maximum from 493 to 513 nm in the presence of **1** or A $\beta$ (10-35) (data not shown). 10  $\mu$ l of a solution of **1** at 8 mg/ml and 50  $\mu$ M Congo Red was dried onto a glass slide and observed microscopically at a magnification of 80,000x. **A.** Fibrils of **1** stained with Congo Red. **B.** Typical apple-green birefringence of the same fibrils was detected with crossed polarizing filters.

**Figure 3S.** Tissue transglutaminase (tTG) cross-linking of **1**. Using the reaction conditions described by Dudek and Johnson,<sup>3</sup> 2.4 mg of **1** was mixed to the following tTG/peptide ratios (numbers indicate lanes of the gel): 1) no tTG; 2) 0.004/1; 3) 0.02/1; 4) 0.04/1; 5) 0.08/1. The mixtures were maintained for 4 h at 23°C, terminated by the addition of EDTA, and analyzed by 16.5% Tris-Tricine SDS-PAGE.<sup>4</sup>

**Figure 4S.** Aromatic to  $\alpha$  and  $\beta$  hydrogen region of the NOESY data showing the increased cross peak intensity, particularly in the methyl region, with an increase in pH. Lyophilized peptide was dissolved in 0.6 ml of 10% D<sub>2</sub>O/H<sub>2</sub>O containing 0.5 mM DSS to a final concentration 2.1 mM. The pH was adjusted to 3.0 (A) and 5.6 (B) with NaOH/HCl and centrifuged for 15 minutes at 14,000 x g. <sup>1</sup>H-NMR data were collected on a Varian 500 MHz Unity INOVA NMR spectrometer with a 5 mm probe using a 200 ms flip-back NOESY pulse sequence at 10 °C. 2D Data sets were collected with 256 FIDs of 2k data points, 64 scans per FID and a spectral width of 5000 Hz. Standard Varian data processing and data acquisition were used.

## References

1. Matsudaira, P. *Methods in Enzymology* 182, 1990, 602-613.
2. Klunk, W.E.; Pettegrew, J.W.; Abraham, D.J. *J. Histochem. Cytochem.*, 1989, 37, 1273-81.
3. Dudek, S. M.; Johnson, G.V.W. *Brain Res.*, 1994, 651, 129-133.
4. Schagger, H.; von Jagow, G. *Analytical Biochem.* 1987, 166, 368.

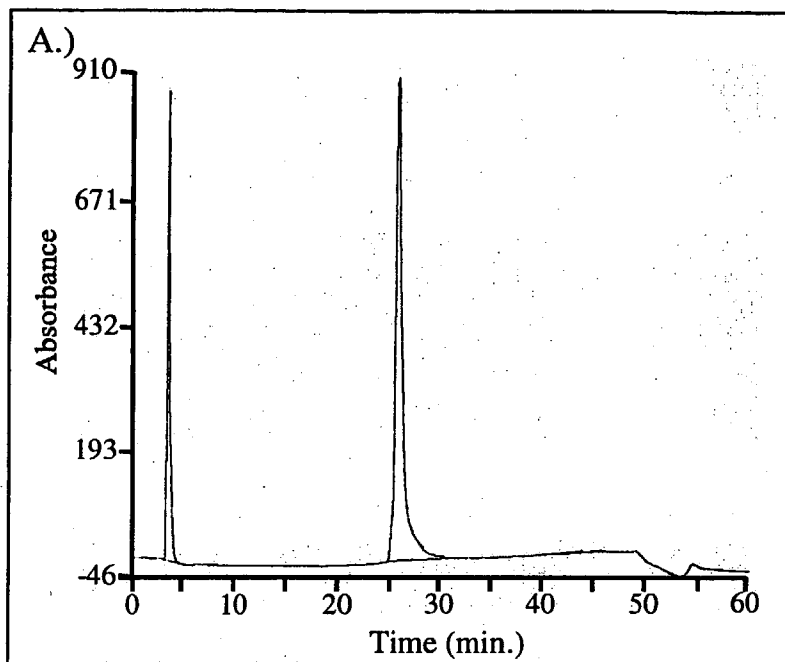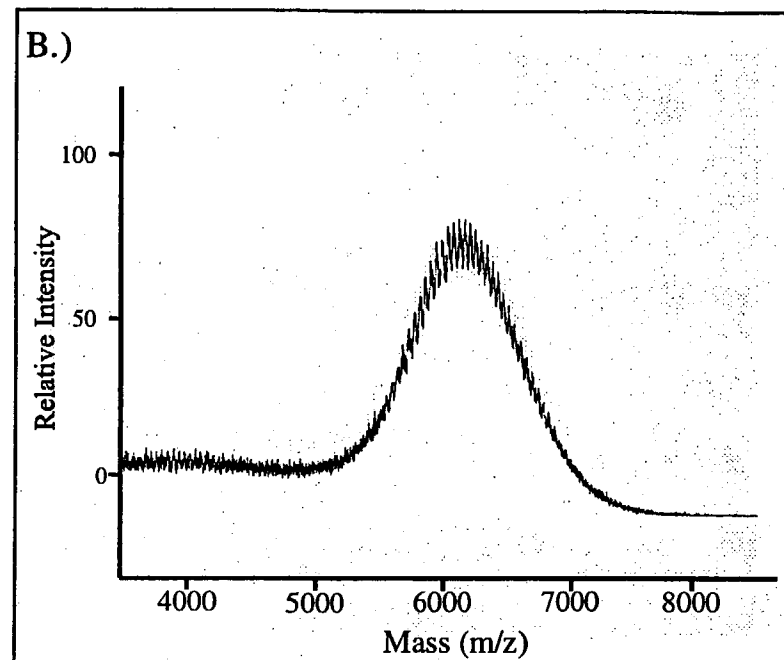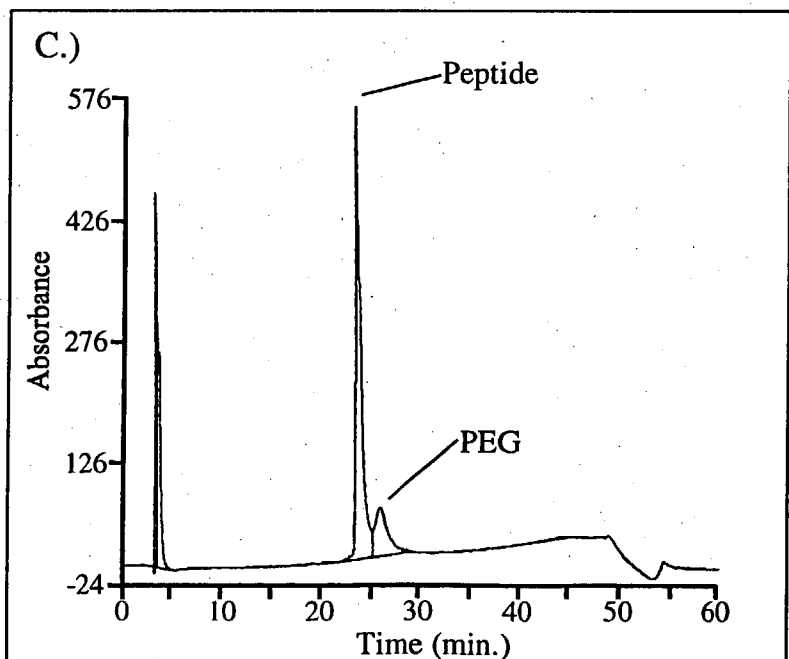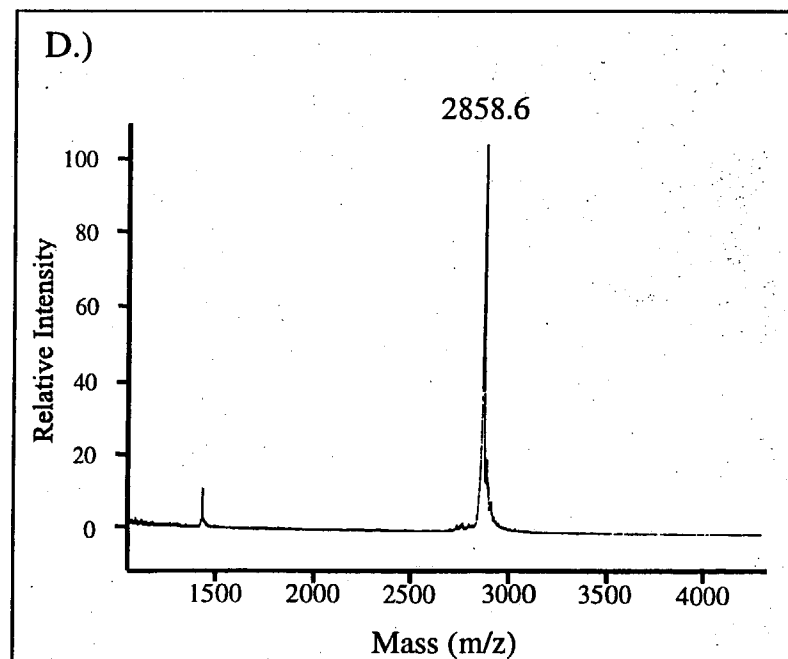

B.)

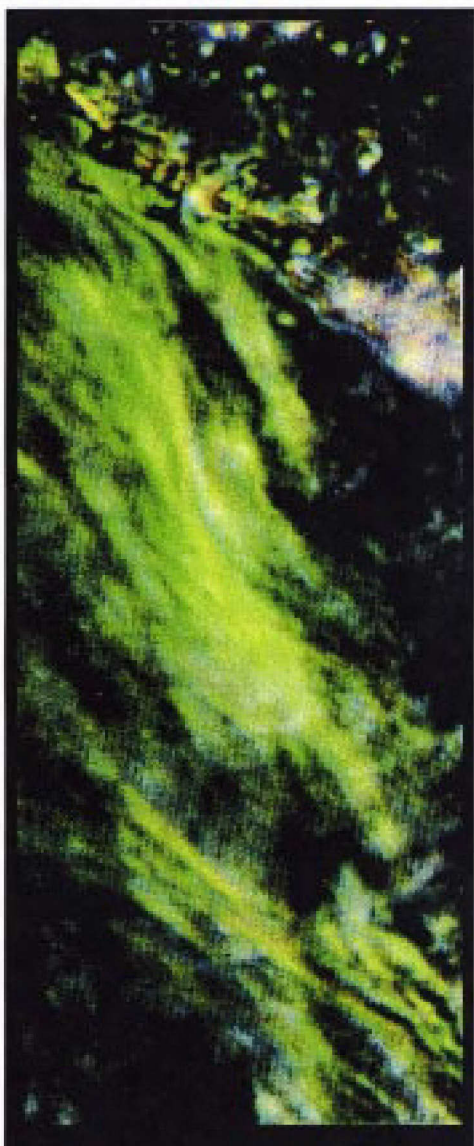

A.)

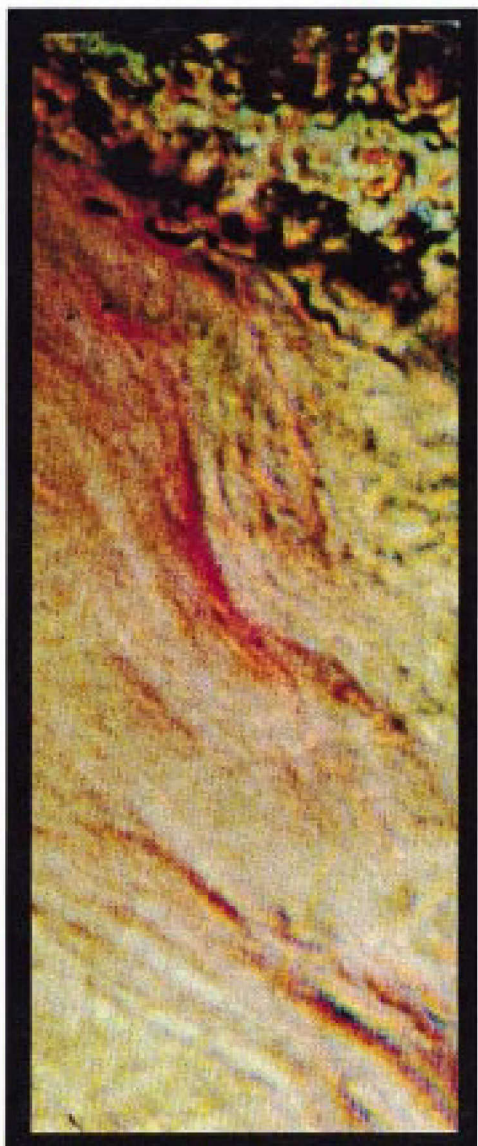

4 5

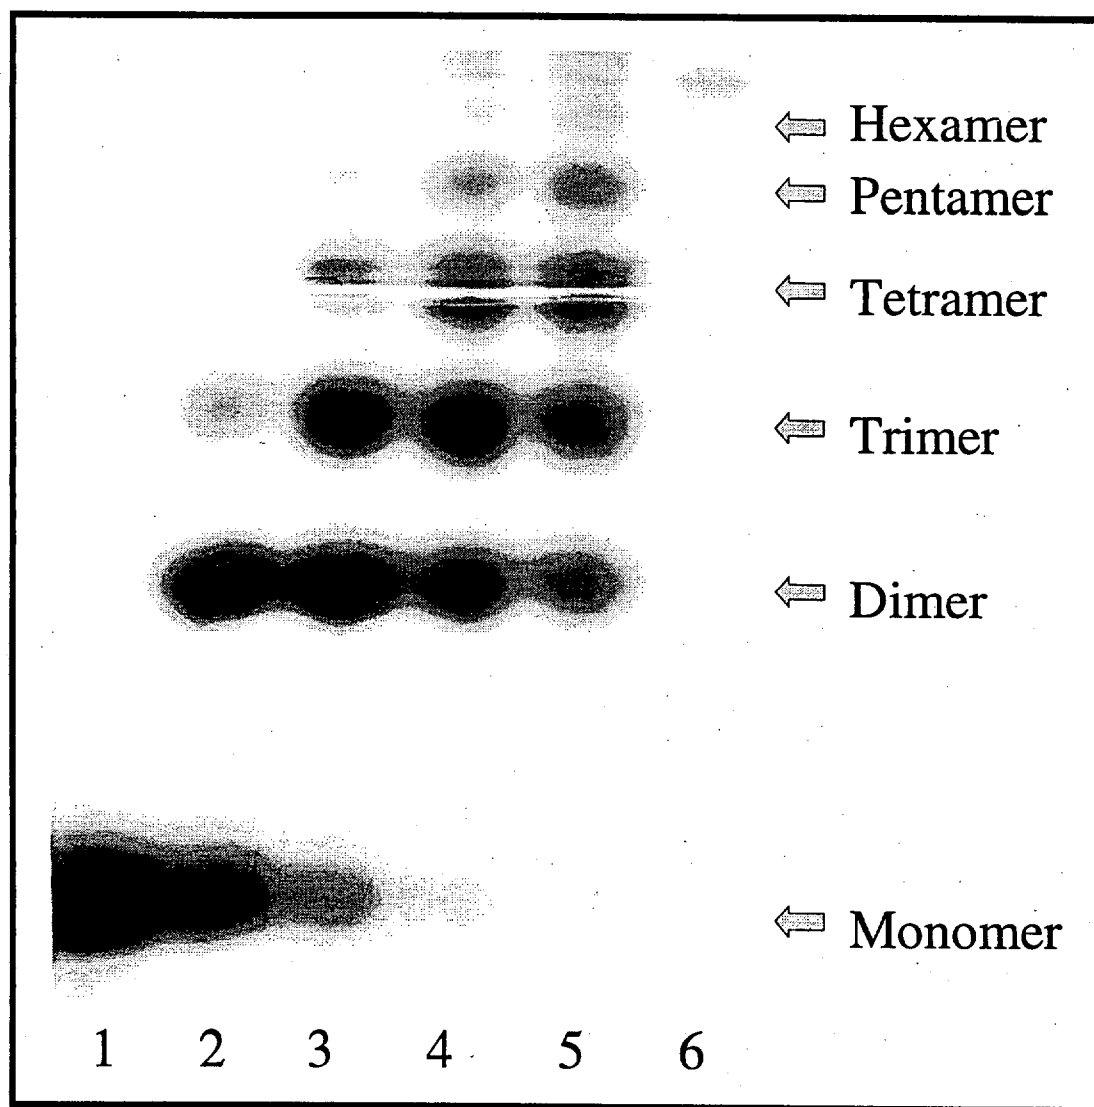

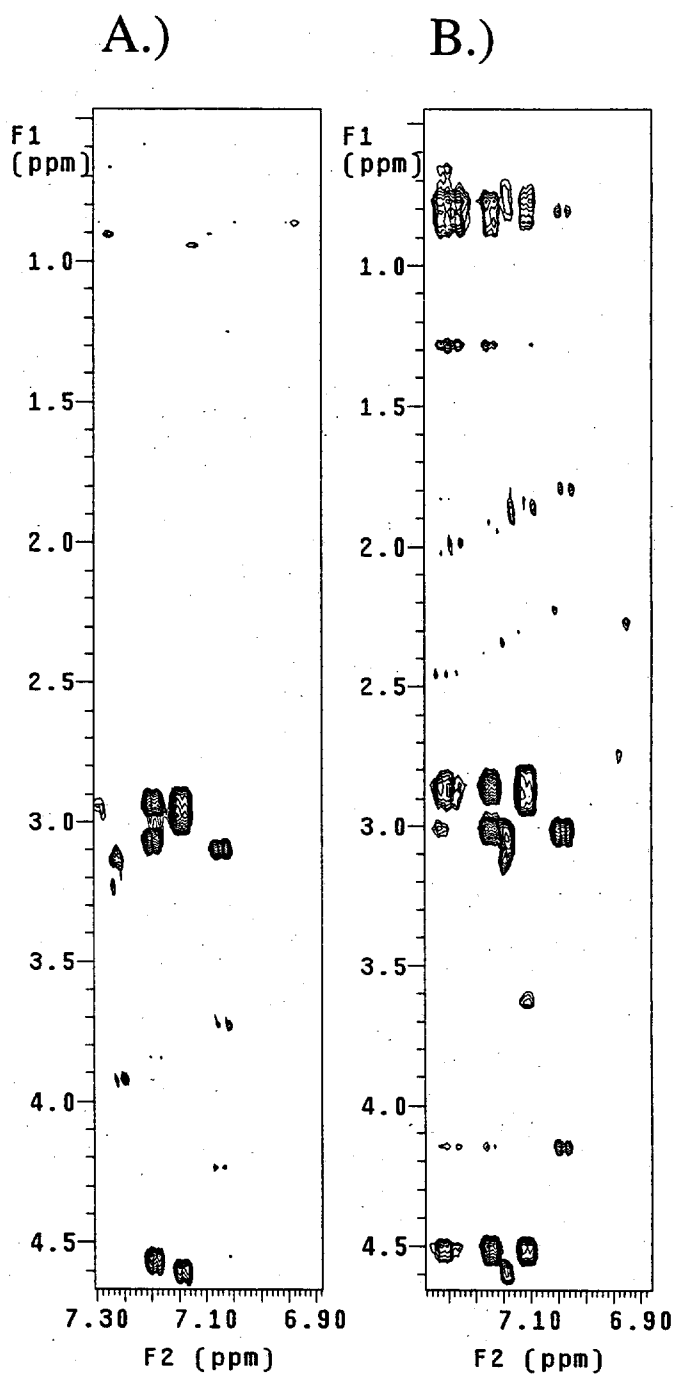

Supplement: Supplementary file 1 [file 5759307]
